# Supplementary material for: Improved design of inherently chiral calix[4]arenes as organocatalysts
Source: Royal Society of Chemistry journal article supplement (doi:10.1039/b9nj00685k), 2010-01-01

## Supplementary Information

# Improved design of inherently chiral calix[4]arenes as organocatalysts

Seiji Shirakawa and Shoichi Shimizu\*

*Department of Applied Molecular Chemistry, College of Industrial Technology,*

*Nihon University, Narashino, Chiba, 275-8575, Japan*

shimizu.shouichi@nihon-u.ac.jp

### 3-(Phenylthio)cyclohexanone (4a)

$^1\text{H}$  NMR (400 MHz,  $\text{CDCl}_3$ )  $\delta$  7.40–7.43 (m, 2H), 7.25–7.33 (m, 3H), 3.39–3.45 (m, 1H), 2.65–2.70 (m, 1H), 2.28–2.40 (m, 3H), 2.10–2.16 (m, 2H), 1.66–1.78 (m, 2H) ppm;  $^{13}\text{C}$  NMR (100 MHz,  $\text{CDCl}_3$ )  $\delta$  208.71, 133.15, 132.96, 129.03, 127.74, 47.69, 46.04, 40.83, 31.15, 23.97 ppm; IR 2946, 1715, 1222, 745, 694  $\text{cm}^{-1}$ ; MS (EI)  $m/z$  206 ( $\text{M}^+$ ), 110, 97. HPLC analysis: CHIRALPAC IA, hexane/*i*-PrOH = 90/10, flow rate = 1.0 ml/min, retention time; 6.6 min (*S*) and 8.3 min (*R*).

### 3-(4-*tert*-Butylphenylthio)cyclohexanone (4b)

$^1\text{H}$  NMR (400 MHz,  $\text{CDCl}_3$ )  $\delta$  7.31–7.37 (m, 4H), 3.33–3.39 (m, 1H), 2.64–2.69 (m, 1H), 2.25–2.39 (m, 3H), 2.09–2.19 (m, 2H), 1.66–1.77 (m, 2H), 1.30 (s, 9H) ppm;  $^{13}\text{C}$  NMR (100 MHz,  $\text{CDCl}_3$ )  $\delta$  208.85, 151.13, 133.42, 129.26, 126.07, 47.83, 46.29, 40.84, 34.55, 31.22, 24.05 ppm; IR 2963, 1716, 734  $\text{cm}^{-1}$ ; MS (EI)  $m/z$  262 ( $\text{M}^+$ ), 166, 97. HPLC analysis: CHIRALPAC IA, hexane/*i*-PrOH = 90/10, flow rate = 1.0 ml/min, retention time; 4.9 min (*S*) and 5.4 min (*R*).

### 3-(2-Naphthylthio)cyclohexanone (4c)

$^1\text{H}$  NMR (400 MHz,  $\text{CDCl}_3$ )  $\delta$  7.74–7.89 (m, 4H), 7.43–7.49 (m, 3H), 3.48–3.55 (m, 1H), 2.68–2.75 (m, 1H), 2.26–2.43 (m, 3H), 2.07–2.16 (m, 2H), 1.62–1.75 (m, 2H) ppm;  $^{13}\text{C}$  NMR (100 MHz,  $\text{CDCl}_3$ )  $\delta$  208.54, 133.41, 132.34, 131.91, 130.24, 130.02, 128.50, 127.54, 127.31, 126.48, 126.29, 47.55, 45.86, 40.70, 31.04, 23.82 ppm; IR 2933, 2858, 1713, 820, 746  $\text{cm}^{-1}$ . HPLC analysis: CHIRALPAC IA, hexane/*i*-PrOH = 90/10, flow rate = 1.0 ml/min, retention time; 9.2 min (*S*) and 10.5 min (*R*).

### 3-(Phenylthio)cycloheptanone (4d)

$^1\text{H}$  NMR (400 MHz,  $\text{CDCl}_3$ )  $\delta$  7.33–7.42 (m, 2H), 7.23–7.33 (m, 3H), 3.38–3.44 (m, 1H), 2.68–2.82 (m, 2H), 2.44–2.60 (m, 2H), 2.12–2.17 (m, 1H), 1.94–2.00 (m, 1H), 1.81–1.88 (m, 1H), 1.62–1.78 (m, 2H), 1.46–1.57 (m, 1H) ppm;  $^{13}\text{C}$  NMR (100 MHz,  $\text{CDCl}_3$ )  $\delta$  211.47, 133.96, 132.34, 129.01, 127.40, 49.41, 44.10, 43.94, 36.79, 28.05, 23.82 ppm; IR 3057, 2929, 2856, 1670, 1478, 1440, 741, 692  $\text{cm}^{-1}$ . HPLC analysis: CHIRALPAC AS, hexane/*i*-PrOH = 50/50, flow rate = 1.0 ml/min, retention time; 7.8 min (*R*) and 12.0 min (*S*).

### 1,3-Diphenyl-3-(phenylthio)propan-1-one (4e)

$^1\text{H}$  NMR (400 MHz,  $\text{CDCl}_3$ )  $\delta$  7.88 (d,  $J$  = 7.4 Hz, 2H), 7.54 (t,  $J$  = 7.4 Hz, 1H), 7.43 (t,  $J$  = 7.7 Hz, 2H), 7.31–7.34 (m, 4H), 7.17–7.27 (m, 6H), 4.95 (dd,  $J$  = 6.0, 8.1 Hz, 1H), 3.67 (dd,  $J$  = 8.2, 17.2 Hz, 1H), 3.57 (dd,  $J$  = 5.9, 17.2 Hz, 1H) ppm;  $^{13}\text{C}$  NMR (100 MHz,  $\text{CDCl}_3$ )  $\delta$  196.88, 141.07, 136.56, 134.13, 133.17, 132.61, 128.76, 128.51, 128.36, 127.95, 127.70, 127.42, 127.27, 48.07, 44.56 ppm;

IR 3060, 2902, 1679, 1451, 1230, 739, 696, 684  $\text{cm}^{-1}$ . HPLC analysis: CHIRALCEL OD, hexane/*i*-PrOH = 99/1, flow rate = 1.0 ml/min, retention time; 15.0 min (*S*) and 18.1 min (*R*).

***tert*-Butyl 2-(diphenylmethyleamino)-3-phenylpropanoate (5a)**

$^1\text{H}$  NMR (400 MHz,  $\text{CDCl}_3$ )  $\delta$  7.56–7.58 (m, 2H), 7.24–7.38 (m, 6H), 7.15–7.21 (m, 3H), 7.04–7.06 (m, 2H), 6.59 (br d,  $J = 5.8$  Hz, 2H), 4.11 (dd,  $J = 4.3, 9.2$  Hz, 1H), 3.23 (dd,  $J = 4.3, 13.3$  Hz, 1H), 3.16 (dd,  $J = 9.2, 13.3$  Hz, 1H), 1.44 (s, 9H) ppm;  $^{13}\text{C}$  NMR (100 MHz,  $\text{CDCl}_3$ )  $\delta$  170.81, 170.29, 139.51, 138.30, 136.32, 130.05, 129.84, 128.68, 128.15, 128.04, 128.01, 127.90, 127.61, 126.12, 81.10, 67.89, 39.54, 28.00 ppm; IR 3060, 3028, 2977, 2928, 1735, 1150, 1081, 698  $\text{cm}^{-1}$ . HPLC analysis: CHIRALCEL OD, hexane/*i*-PrOH = 99/1, flow rate = 1.0 ml/min, retention time; 6.7 min (*R*) and 10.3 min (*S*).

***tert*-Butyl 2-(diphenylmethyleamino)pent-4-enoate (5b)**

$^1\text{H}$  NMR (400 MHz,  $\text{CDCl}_3$ )  $\delta$  7.63–7.65 (m, 2H), 7.30–7.47 (m, 6H), 7.16–7.19 (m, 2H), 5.67–5.77 (m, 1H), 5.00–5.09 (m, 2H), 4.01 (dd,  $J = 5.3, 7.6$  Hz, 1H), 2.57–2.70 (m, 2H), 1.44 (s, 9H) ppm;  $^{13}\text{C}$  NMR (100 MHz,  $\text{CDCl}_3$ )  $\delta$  170.87, 170.11, 139.67, 136.62, 134.68, 130.15, 128.77, 128.48, 128.36, 127.95, 127.90, 117.27, 81.02, 65.78, 38.12, 28.04 ppm; IR 3061, 2978, 2925, 1734, 1624, 1153, 698  $\text{cm}^{-1}$ . HPLC analysis: CHIRALPAC IC, hexane/*i*-PrOH = 99/1, flow rate = 1.0 ml/min, retention time; 6.8 min (*R*) and 8.1 min (*S*).

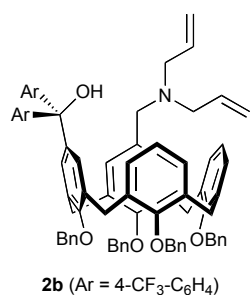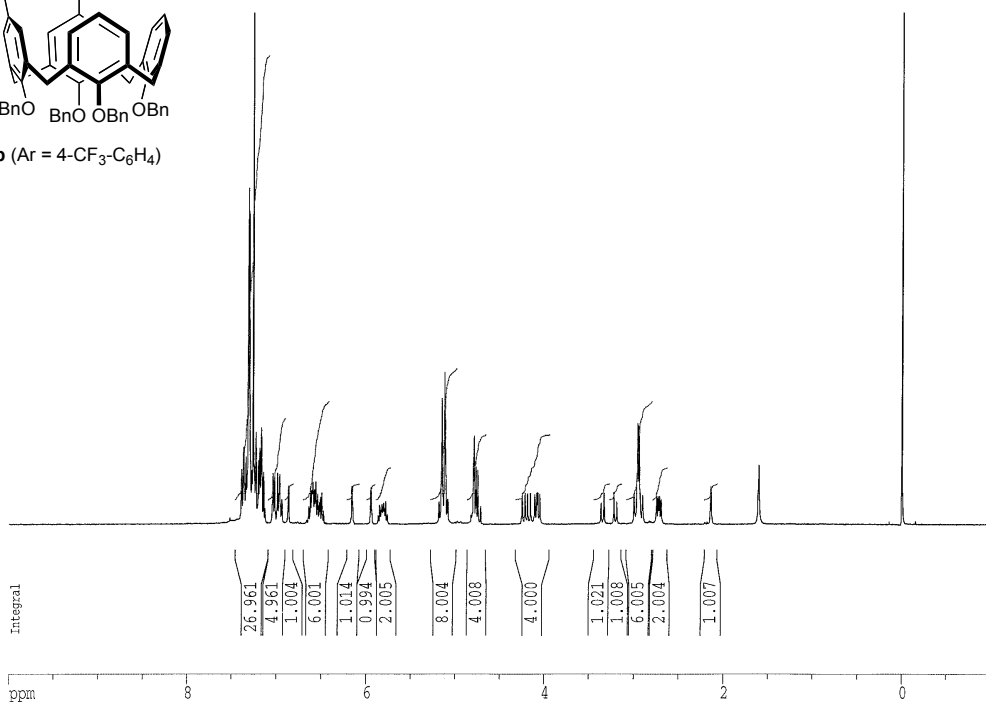

Current Data Parameters  
 NAME Mar04-2009  
 EXPNO 100  
 PROCNO 1

F2 - Acquisition Parameters  
 Date\_ 20090304  
 Time 13.41  
 INSTRUM dpx400  
 PROBHD 5 mm QNP 1H/1  
 PULPROG zg30  
 TD 65536  
 SOLVENT CDCl3  
 NS 16  
 DS 2  
 SWH 8278.146 Hz  
 FIDRES 0.126314 Hz  
 AQ 3.9584243 sec  
 RG 322.5  
 DW 60.400 usec  
 DE 6.00 usec  
 TE 300.0 K  
 D1 1.0000000 sec

===== CHANNEL f1 =====  
 NUC1 1H  
 P1 8.90 usec  
 PL1 -2.00 dB  
 SFO1 400.1324710 MHz

F2 - Processing parameters  
 SI 32768  
 SF 400.1300090 MHz  
 WDW EM  
 SSB 0  
 LB 0.30 Hz  
 GB 0  
 PC 1.00

1D NMR plot parameters  
 CX 20.00 cm  
 FLP 10.000 ppm  
 F1 4001.30 Hz  
 F2P -1.000 ppm  
 F2 -400.13 Hz  
 PPMCM 0.55000 ppm/cm  
 HZCM 220.07150 Hz/cm

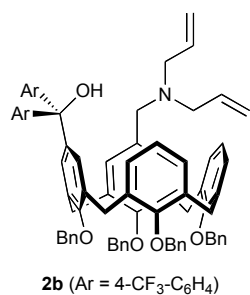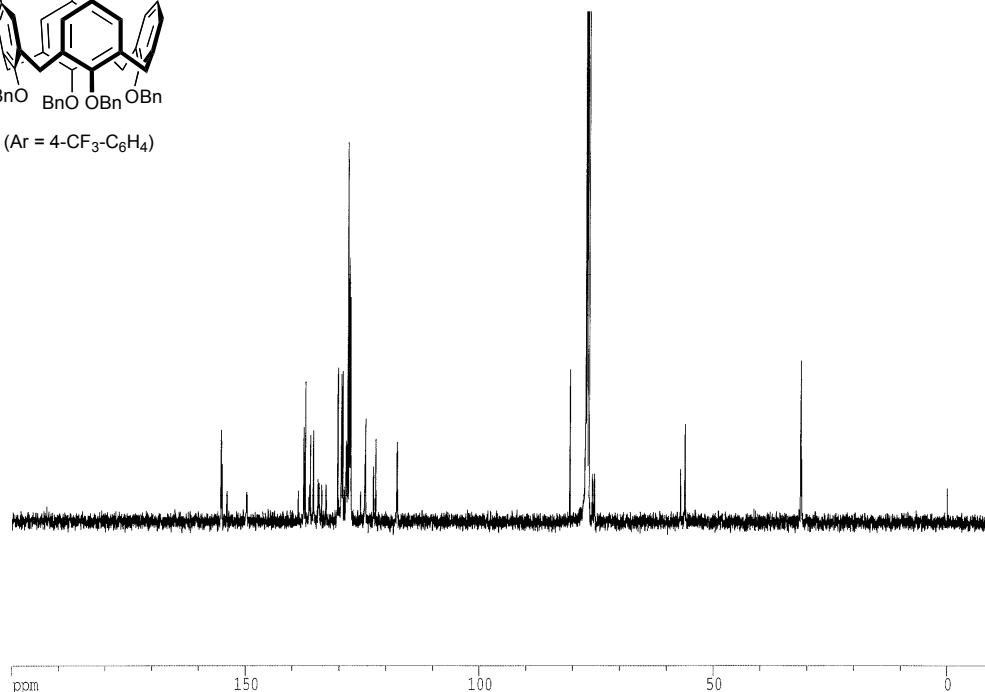

Current Data Parameters  
 NAME Mar04-2009  
 EXPNO 250  
 PROCNO 1

F2 - Acquisition Parameters  
 Date\_ 20090304  
 Time 20.59  
 INSTRUM dpx400  
 PROBHD 5 mm QNP 1H/1  
 PULPROG zgpg30  
 TD 65536  
 SOLVENT CDCl3  
 NS 12824  
 DS 2  
 SWH 25125.629 Hz  
 FIDRES 0.383387 Hz  
 AQ 1.3042164 sec  
 RG 8192  
 DW 19.900 usec  
 DE 6.00 usec  
 TE 300.0 K  
 D1 2.0000000 sec  
 D11 0.0300000 sec  
 D12 0.00002000 sec

===== CHANNEL f1 =====  
 NUC1 13C  
 P1 8.00 usec  
 PL1 -2.00 dB  
 SFO1 100.6237959 MHz

===== CHANNEL f2 =====  
 CPDPRG2 waltz16  
 NUC2 1H  
 PCPD2 80.00 usec  
 PL2 -2.00 dB  
 PL12 18.00 dB  
 PL13 18.00 dB  
 SFO2 400.1316005 MHz

F2 - Processing parameters  
 SI 32768  
 SF 100.6127754 MHz  
 WDW EM  
 SSB 0  
 LB 1.00 Hz  
 GB 0  
 PC 1.40

1D NMR plot parameters  
 CX 20.00 cm  
 FLP 200.000 ppm  
 F1 20122.55 Hz  
 F2P -10.000 ppm  
 F2 -1006.13 Hz  
 PPMCM 10.50000 ppm/cm  
 HZCM 1056.43420 Hz/cm

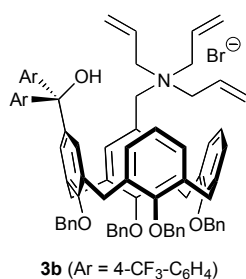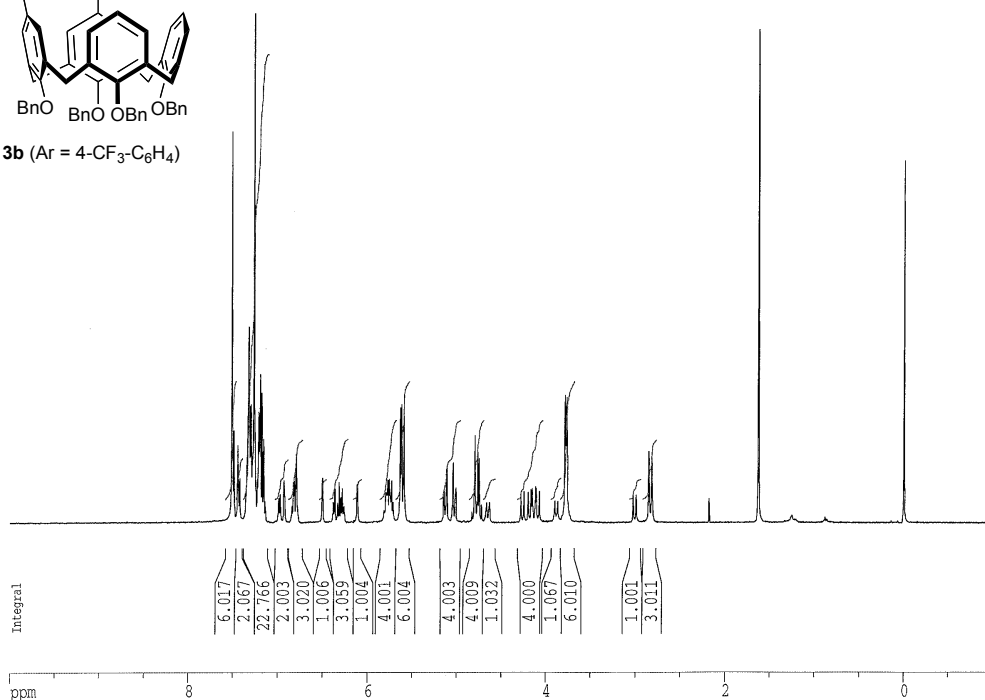

Current Data Parameters  
 NAME Mar04-2009  
 EXPNO 230  
 PROCNO 1

F2 - Acquisition Parameters  
 Date\_ 20090304  
 Time 19.55  
 INSTRUM dpx400  
 PROBHD 5 mm QNP 1H/1  
 PULPROG zg30  
 TD 65536  
 SOLVENT CDCl3  
 NS 16  
 DS 2  
 SWH 8278.146 Hz  
 FIDRES 0.126314 Hz  
 AQ 3.9584243 sec  
 RG 322.5  
 DW 60.400 usec  
 DE 6.00 usec  
 TE 300.0 K  
 D1 1.00000000 sec

===== CHANNEL f1 =====  
 NUC1 1H  
 P1 8.90 usec  
 PL1 -2.00 dB  
 SFO1 400.1324710 MHz

F2 - Processing parameters  
 SI 32768  
 SF 400.1300080 MHz  
 WDW EM  
 SSB 0  
 LB 0.30 Hz  
 GB 0  
 PC 1.00

1D NMR plot parameters  
 CX 20.00 cm  
 F1P 10.000 ppm  
 F1 4001.30 Hz  
 F2P -1.000 ppm  
 F2 -400.13 Hz  
 PPMCM 0.55000 ppm/cm  
 HZCM 220.07150 Hz/cm

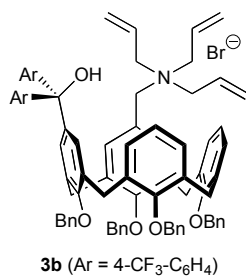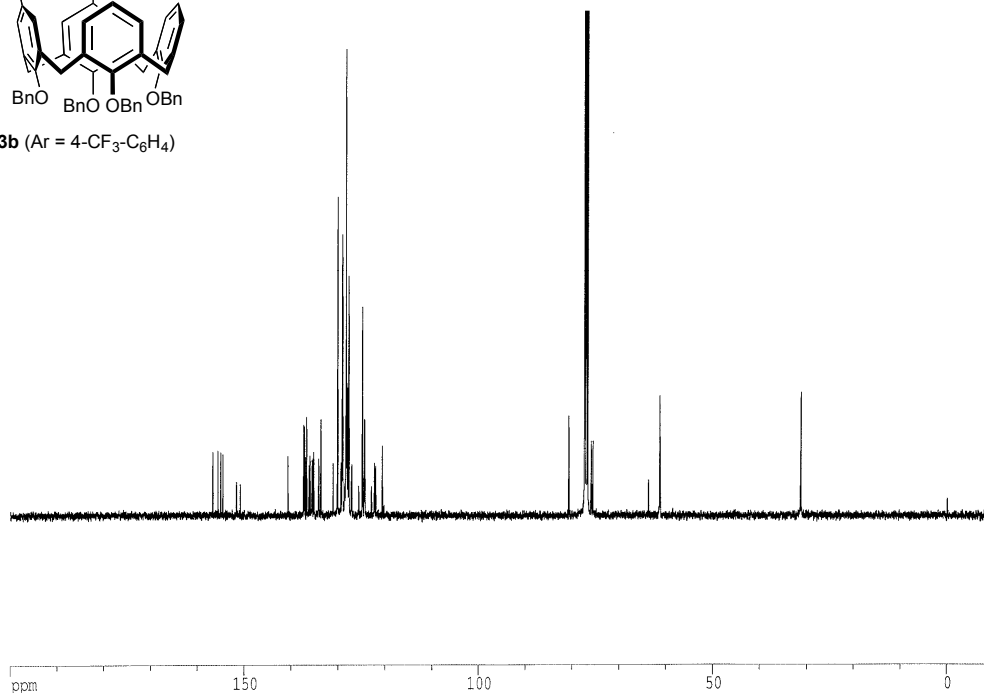

Current Data Parameters  
 NAME Mar05-2009  
 EXPNO 150  
 PROCNO 1

F2 - Acquisition Parameters  
 Date\_ 20090305  
 Time 21.10  
 INSTRUM dpx400  
 PROBHD 5 mm QNP 1H/1  
 PULPROG zgpg30  
 TD 65536  
 SOLVENT CDCl3  
 NS 12085  
 DS 2  
 SWH 25125.629 Hz  
 FIDRES 0.383387 Hz  
 AQ 1.3042164 sec  
 RG 16384  
 DW 19.900 usec  
 DE 6.00 usec  
 TE 300.0 K  
 D1 2.00000000 sec  
 D11 0.03000000 sec  
 D12 0.00002000 sec

===== CHANNEL f1 =====  
 NUC1 13C  
 P1 8.00 usec  
 PL1 -2.00 dB  
 SFO1 100.6237959 MHz

===== CHANNEL f2 =====  
 CPDPRG2 waltz16  
 NUC2 1H  
 PCPD2 80.00 usec  
 PL2 -2.00 dB  
 PL12 18.00 dB  
 PL13 18.00 dB  
 SFO2 400.1316005 MHz

F2 - Processing parameters  
 SI 32768  
 SF 100.6177800 MHz  
 WDW EM  
 SSB 0  
 LB 1.00 Hz  
 GB 0  
 PC 1.40

1D NMR plot parameters  
 CX 20.00 cm  
 F1P 200.000 ppm  
 F1 20122.55 Hz  
 F2P -10.000 ppm  
 F2 -1006.13 Hz  
 PPMCM 10.50000 ppm/cm  
 HZCM 1056.43420 Hz/cm

**4a:** CHIRALPAC IA, hexane/*i*-PrOH = 90/10, 1.0 ml/min

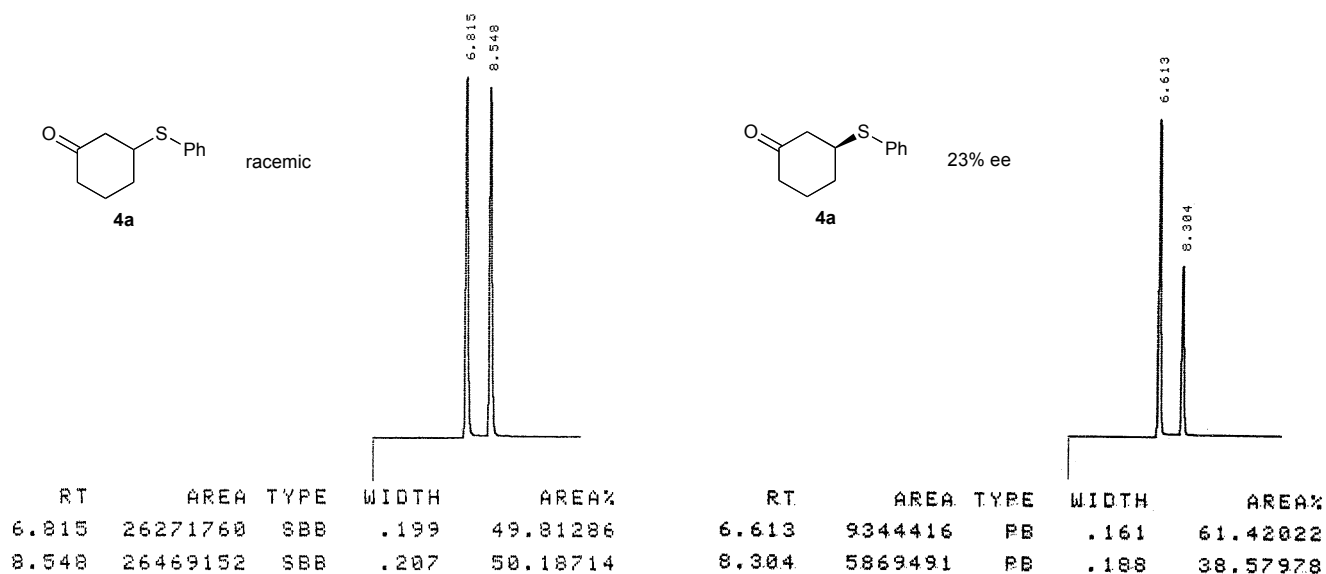

**4b:** CHIRALPAC IA, hexane/EtOH = 90/10, 1.0 ml/min

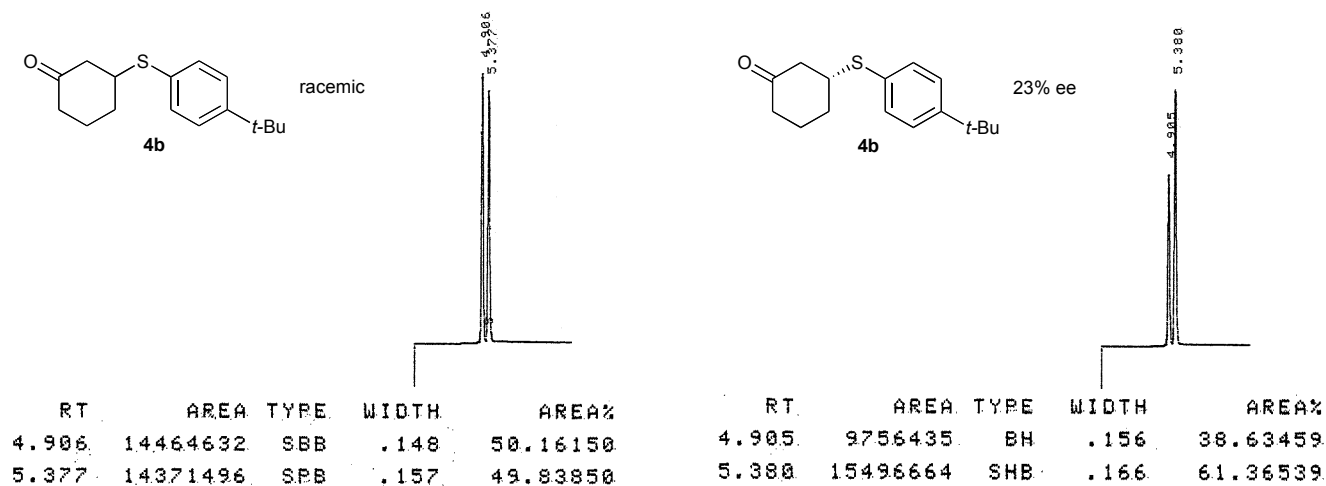

**4c:** CHIRALPAC IA, hexane/*i*-PrOH = 90/10, 1.0 ml/min

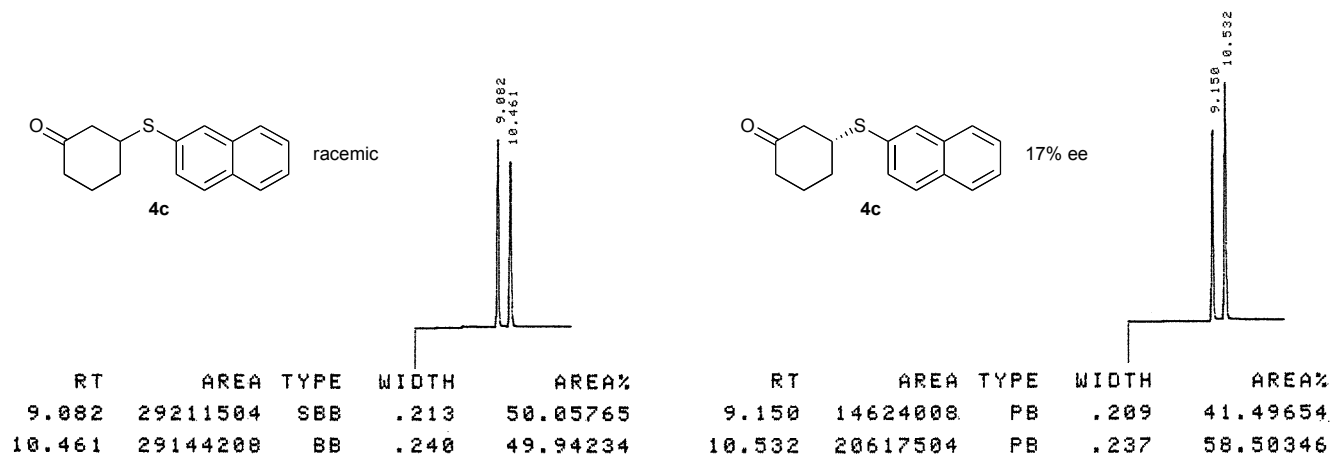

**4d:** CHIRALPAC AS, hexane/ *i*-PrOH = 50/50, 1.0 ml/min

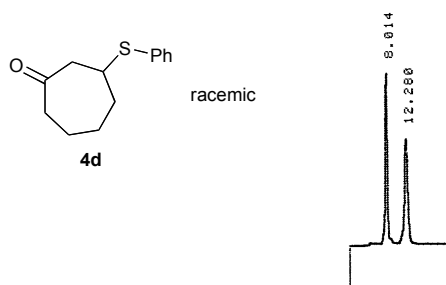

| RT     | AREA     | TYPE | WIDTH | AREA%    |
|--------|----------|------|-------|----------|
| 8.014  | 30283296 | BB   | .498  | 49.90211 |
| 12.280 | 30402096 | BB   | .809  | 50.09787 |

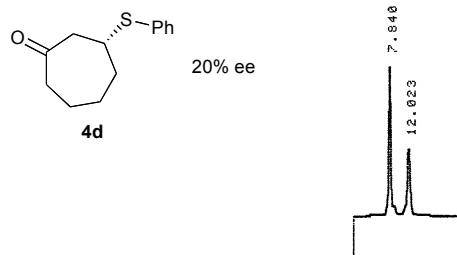

| RT     | AREA     | TYPE | WIDTH | AREA%    |
|--------|----------|------|-------|----------|
| 7.840  | 10578344 | BB   | .420  | 59.86203 |
| 12.023 | 7092864  | BB   | .634  | 40.13797 |

**4e:** CHIRALCEL OD, hexane/ *i*-PrOH = 99/1, 1.0 ml/min

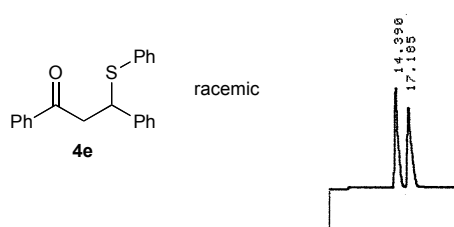

| RT     | AREA     | TYPE | WIDTH | AREA%    |
|--------|----------|------|-------|----------|
| 14.390 | 15531776 | VB   | .835  | 49.95787 |
| 17.185 | 15557976 | VB   | 1.043 | 50.04214 |

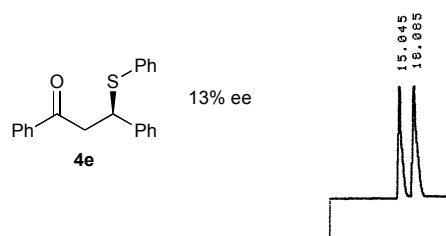

| RT     | AREA     | TYPE | WIDTH | AREA%    |
|--------|----------|------|-------|----------|
| 15.045 | 16843664 | PV   | .832  | 43.38717 |
| 18.085 | 21978112 | VB   | 1.079 | 56.61285 |

**5a:** CHIRALCEL OD, hexane/ *i*-PrOH = 99/1, 1.0 ml/min

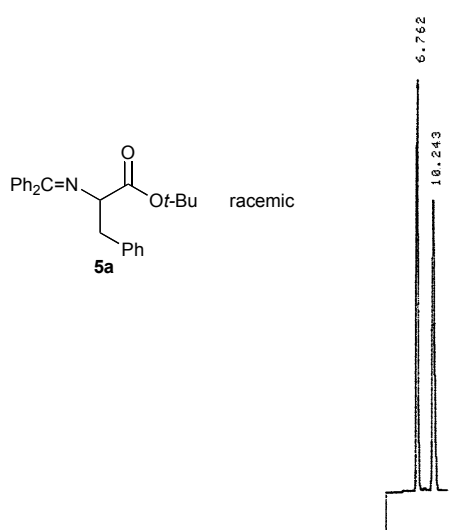

| RT     | AREA     | TYPE | WIDTH | AREA%    |
|--------|----------|------|-------|----------|
| 6.762  | 31113328 | BB   | .413  | 49.92125 |
| 10.243 | 31211488 | BB   | .589  | 50.07874 |

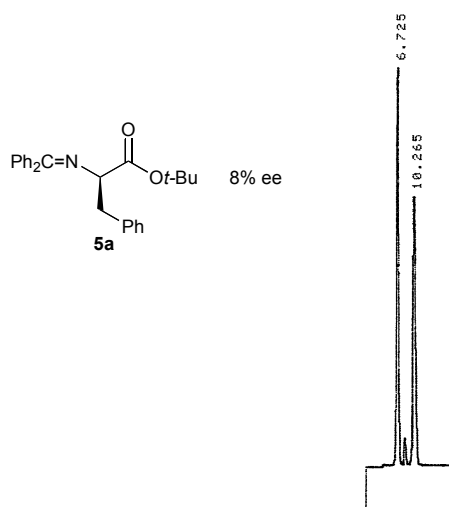

| RT     | AREA     | TYPE | WIDTH | AREA%    |
|--------|----------|------|-------|----------|
| 6.725  | 35339680 | BB   | .489  | 53.87112 |
| 10.265 | 30260704 | BB   | .618  | 46.12886 |

**5b**: CHIRALPAC IC, hexane/*i*-PrOH = 99/1, 1.0 ml/min

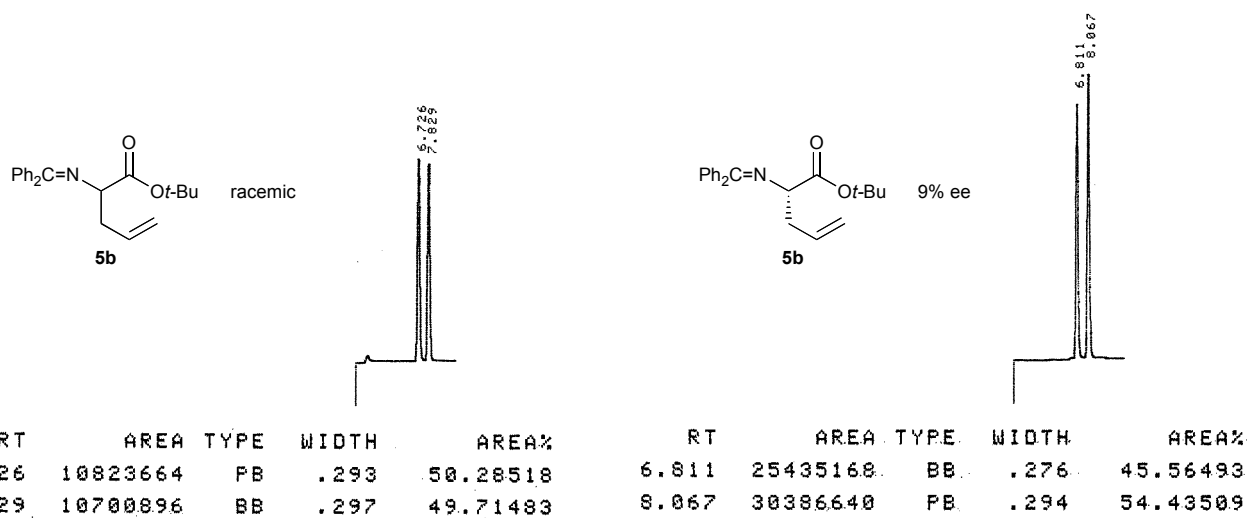

Supplement: b9nj00685k.pdf [file b9nj00685k.pdf]
